# Supplementary material for: Macrophage IL-1β contributes to tumorigenesis through paracrine AIM2 inflammasome activation in the tumor microenvironment
Source: PubMed Central journal article supplement (PMC10338081; doi:10.3389/fimmu.2023.1211730), 2023-06-28
Supplement: DataSheet_1.pdf [file DataSheet_1.pdf]

# Supplementary Materials for

## Macrophage IL1 $\beta$ contributes to tumorigenesis through paracrine AIM2 inflammasome activation in the tumor microenvironment

Zhi Huan Chew<sup>1,2,3,4, †</sup>, Jianzhou Cui<sup>1,2,3, †</sup>, Karishma Sachaphibulkij<sup>1,2,3</sup>, Isabelle Tan<sup>1,2,3</sup>, Shreya Kar<sup>5,6</sup>, Kai Kiat Koh<sup>1,2,3</sup>, Kritika Singh<sup>5</sup>, Hong Meng Lim<sup>1,2,3</sup>, Soo Chin Lee<sup>5,7,8</sup>, Alan Prem Kumar<sup>5,6,8</sup>, Stephan Gasser<sup>3,9</sup>, Lina H. K. Lim<sup>1,2,3,4</sup>

\*Corresponding author. Lina H. K. Lim Email:

**This file includes:**

**Figs. S1 to S4**

## Supplementary figures

**A**

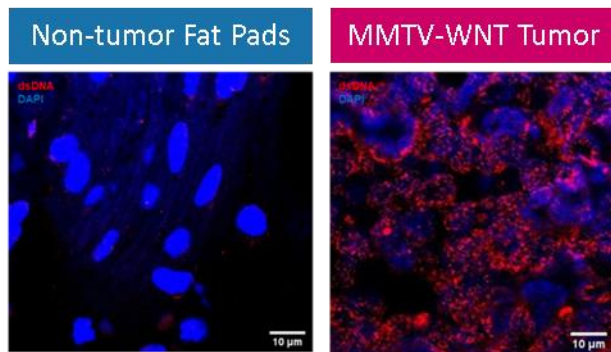

**B**

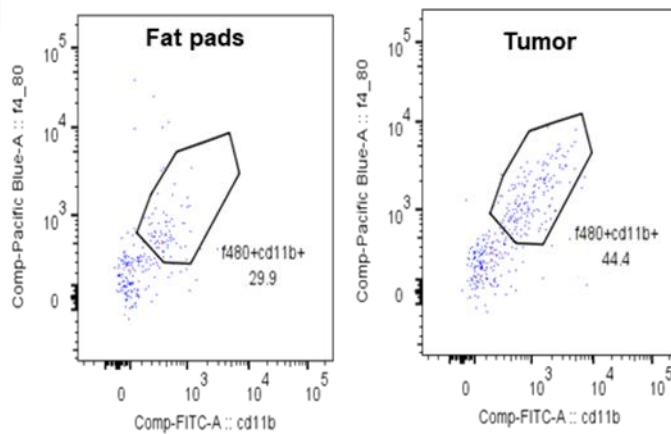

**Fig. S1. The difference of dsDNA between MMTV-Wnt+mice and non-tumor fat pads.** (A) MMTV Tissues and non-cancerous fat pads from mice were co-labelled for dsDNA (red) in the presence of DAPI (blue). (B) Representative flow cytometric analysis showing the gating strategy to identify Live CD45+F4/80+CD11b+ tumour-associated macrophages (TAM) from tumors of MMTV-Wnt+ mice and normal mouse fat pads from MMTV-Wnt- mice. Data are representatives from n=3-5 mice.

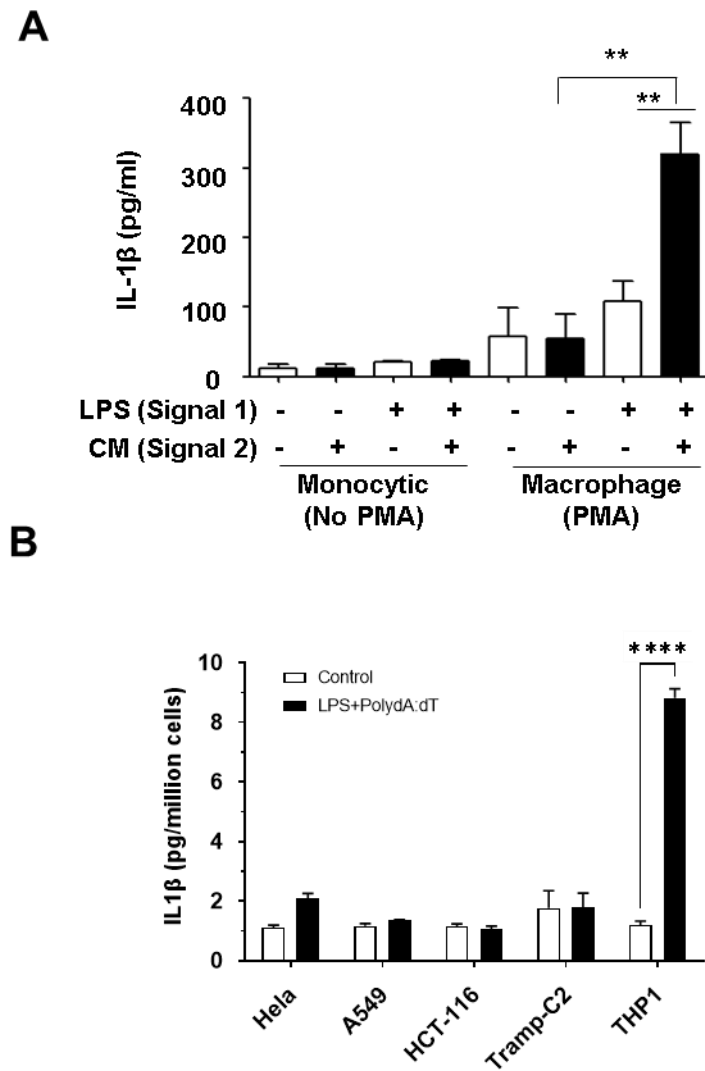

**Fig. S2. Inflammasome activation optimization in macrophages and epithelial cells. (A)** THP-1 cells were treated with or without PMA (100ng/ml), LPS (1 $\mu$ g/ml) for 24h, followed by A549 conditioned media, or DMEM only for 24h. IL-1 $\beta$  levels in cell supernatants were analyzed using ELISA. **(B)** IL1 $\beta$  production was measured in various epithelial cancer cells and THP1 cells after treatment with LPS and Poly:datdt. Data represents mean  $\pm$  SEM of 3-5 independent experiments. \*\* $p < 0.01$ , \*\*\*\*  $p < 0.00001$

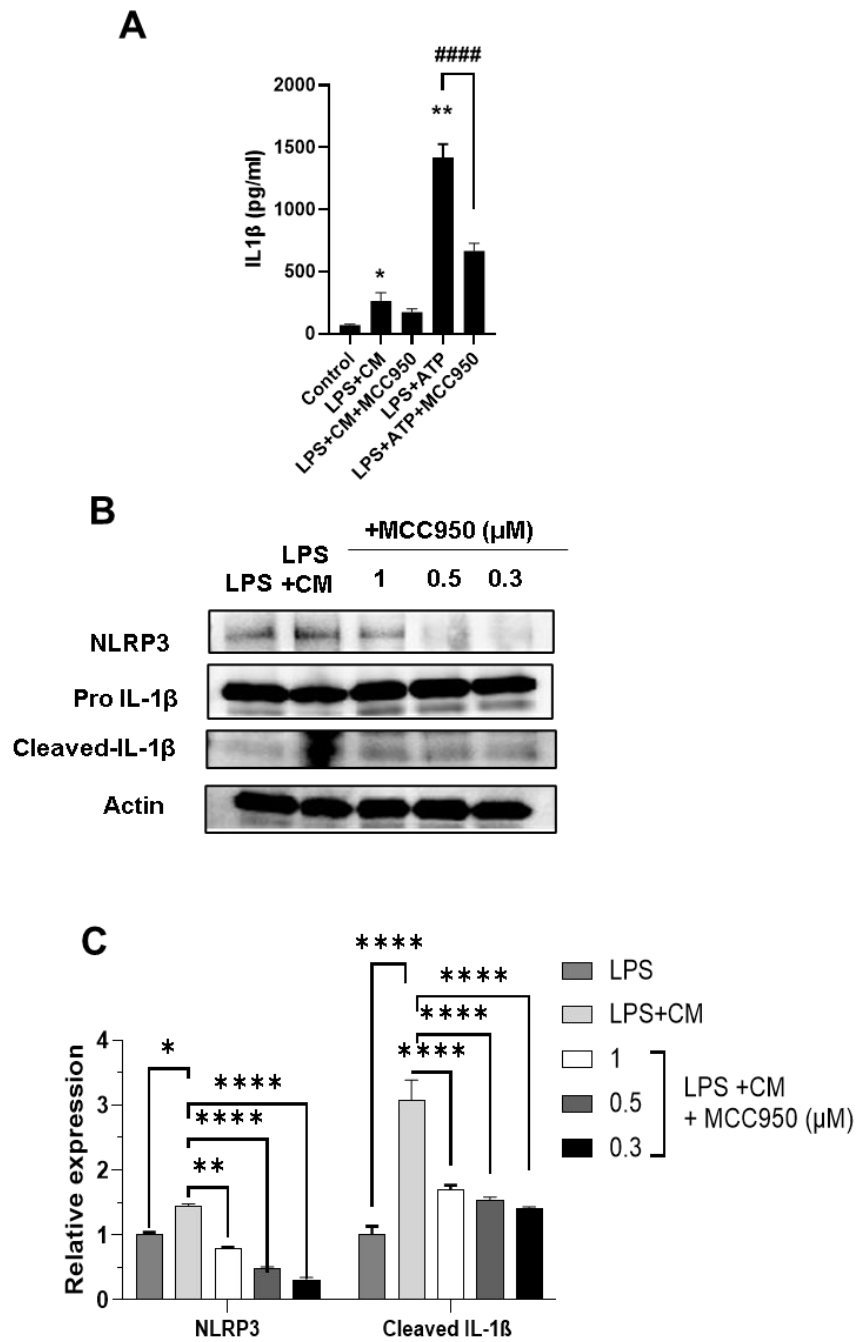

**Fig S3. Inhibition of NLRP3 with MCC950 reverses IL1 $\beta$  production induced by tumor CM.** (A) IL-1 $\beta$  levels and (B) inflammasome activation in LPS and PMA primed THP-1 cells pre-treated with MCC950 for 1h prior to treatment with A549 CM. (C) Quantification of immunoblots using Image J (fold change vs loading control) \* # p<0.05; \*\* ## p<0.01; \*\*\* ### p<0.001 \*\*\*\* #### p<0.0001.

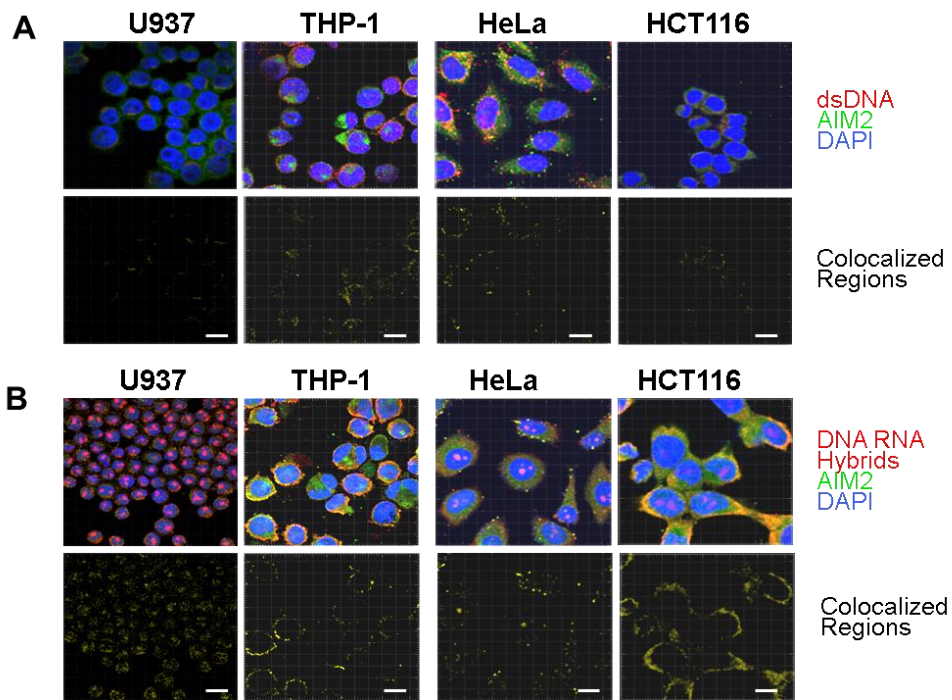

**Fig S4. AIM2 colocalizes with dsDNA and DNA-RNA hybrids in various cancer cell lines.** U937, THP1, HeLa and HCT116 cancer cells were co-labelled for AIM2 (green) and dsDNA (red) or -DNA-RNA hybrids (red) in presence of DAPI (blue). Co-localized regions are shown in yellow. Bar=20 $\mu$ m.
